# Supplementary material for: RET signaling in breast cancer therapeutic resistance and metastasis
Source: Springer Nature journal article supplement (doi:10.1186/s13058-023-01622-7), 2023-03-14
Supplement: MOESM1 [file 24623220]

**Table 1. Active clinical trials for RET-targeting agents in cancer**

| Drug name (company)                            | ClinicalTrials.gov Identifier                | MKI or RET-Selective | Disease Conditions                                                                 | Treatments Combined                      | Phase Achieved | Associated Publications |
|------------------------------------------------|----------------------------------------------|----------------------|------------------------------------------------------------------------------------|------------------------------------------|----------------|-------------------------|
| <b>BOS172738 (Boston Pharmaceuticals)</b>      | NCT03780517                                  | RET-Selective        | RET-altered MTC and NSCLC                                                          | NA                                       | 1              | Schoffski et. al 2021   |
| <b>Pralsetinib (Blueprint Medicine)</b>        | NCT04302025                                  | RET-Selective        | RET-altered NSCLC                                                                  | SOC chemotherapy + resection as required | 2              |                         |
|                                                | NCT04760288                                  |                      | Medullary Thyroid Cancer                                                           | NA                                       | 3              | NA                      |
|                                                | NCT04697446                                  |                      | RET-Fusion positive NSCLC                                                          | NA                                       | Retrospective  | NA                      |
|                                                | NCT04222972                                  |                      | RET-Fusion positive NSCLC                                                          | NA                                       | 3              | NA                      |
|                                                | NCT03037385                                  |                      | Multiple solid tumors                                                              | NA                                       | 2              | NA                      |
| <b>Selpercatinib (Loxo Oncology/Eli Lilly)</b> | NCT04280081                                  | RET-Selective        | Medullary Thyroid Carcinoma, other tumors with RET alterations                     | NA                                       | 2              | NA                      |
|                                                | NCT04819100                                  |                      | NSCLC                                                                              | NA                                       | 3              | NA                      |
|                                                | NCT04759911                                  |                      | RET-Altered Thyroid Cancer                                                         | SOC Surgery                              | 2              | NA                      |
|                                                | NCT04320888                                  |                      | Multiple Cancers                                                                   | NA                                       | 2              | NA                      |
|                                                | NCT04268550                                  |                      | RET-Fusion positive NSCLC                                                          | NA                                       | 2              | NA                      |
|                                                | NCT04211337                                  |                      | RET-Mutant Medullary Thyroid Carcinoma                                             | NA                                       | 3              | NA                      |
|                                                | NCT04194944                                  |                      | RET-Fusion positive NSCLC                                                          | NA                                       | 3              | NA                      |
|                                                | NCT03906331                                  |                      | NSCLC, MTC, PTC, Breast, colon, pancreatic, and other cancers with RET alterations | NA                                       | Not listed     | NA                      |
|                                                | NCT03899792                                  |                      | Pediatric CNS tumors                                                               | NA                                       | 2              | NA                      |
| NCT03157128                                    | NSCLC, MTC, Colon cancer, other solid tumors | NA                   | 2                                                                                  | NA                                       |                |                         |
| <b>TAS0953/HM06 (Helsinn)</b>                  | NCT04683250                                  | RET-Selective        | RET-Altered Solid Tumors                                                           | NA                                       | 2              | NA                      |

Table 1. Currently active or recruiting clinical trials of RET-targeting agents. RET is a target of numerous multikinase inhibitors, as displayed here. In contrast, RET-selective targeting agents are a newer class of RTK inhibitors, and are currently being examined for the treatment of a more specific set of cancers. SOC refers to standard-of-care therapy.

**Table 1 (cont). Active clinical trials for RET-targeting agents in cancer**

| Drug name (company)                                 | ClinicalTrials.gov Identifier | MKI or RET-Selective                                             | Disease conditions                                                                | Treatments combined                     | Phase Achieved | Associated Publications |
|-----------------------------------------------------|-------------------------------|------------------------------------------------------------------|-----------------------------------------------------------------------------------|-----------------------------------------|----------------|-------------------------|
| <b>Alectinib (Hoffmann- La Roche)</b>               | NCT03194893                   | MKI (RET, ALK)                                                   | Multiple Cancers                                                                  | Crizotinib                              | 3              | NA                      |
| <b>Anlotinib (Advenchen/Sino Biopharmaceutical)</b> | NCT04073550                   | MKI (VEGFR2/3, FGFR1-4, PDGFR, c-KIT, RET)                       | Small Cell Lung Cancer                                                            | NA                                      | 3              | NA                      |
|                                                     | NCT04073537                   |                                                                  | Squamous NSCLC                                                                    | Paclitaxel, Carboplatin                 | 3              | NA                      |
| <b>Cabozantinib (Exelixis)</b>                      | NCT04204850                   | MKI (c-MET, VEGFR2, AXL, RET)                                    | Hepatocellular Carcinoma                                                          | NA                                      | 2              | NA                      |
|                                                     | NCT04131543                   |                                                                  | NSCLC                                                                             | NA                                      | 2              | NA                      |
|                                                     | NCT03468985                   |                                                                  | NSCLC                                                                             | Nivolumab                               | 2              | NA                      |
|                                                     | NCT03425201                   |                                                                  | Urothelial Cancer                                                                 | Niraparib                               | 2              | NA                      |
|                                                     | NCT01639508                   |                                                                  | NSCLC                                                                             | NA                                      | 2              | Drilon et. al 2016      |
| <b>Lenvatinib</b>                                   | NCT04443309                   | MKI (VEGFR1, 2, 3; FGFR 1,2,3,4; PDGFR, c-KIT, RET)              | Hepatocellular Carcinoma                                                          | Camrelizumab                            | 2              | NA                      |
|                                                     | NCT04425226                   |                                                                  | Hepatocellular Carcinoma                                                          | Pembrolizumab                           | NA             | NA                      |
|                                                     | NCT04368078                   |                                                                  | Hepatocellular Carcinoma                                                          | Toripalimab                             | 2              | NA                      |
|                                                     | NCT04211168                   |                                                                  | Biliary Tract Cancers                                                             | Toripalimab                             | 2              | NA                      |
|                                                     | NCT04207086                   |                                                                  | Melanoma                                                                          | Pembrolizumab                           | 2              | NA                      |
|                                                     | NCT03895970                   |                                                                  | Hepatobiliary Cancers                                                             | Pembrolizumab                           | 2              | NA                      |
| <b>Ponatinib (ARIAD pharmaceuticals)</b>            | NCT02272998                   | MKI (BCR-ABL, VEGFR, PDGFR, FGFR, EPH, KIT, RET, TIE2, and FLT3) | Solid tumors with activating mutations of FGFR1, FGFR2, FGFR3, FGFR4, RET, or KIT | NA                                      | 2              | NA                      |
|                                                     | NCT03838692                   |                                                                  | Medullary Thyroid Cancer                                                          | NA                                      | 2              | NA                      |
| <b>Regorafenib (Bayer)</b>                          | NCT05048017                   | MKI (VEGFR1-3, TIE2, PDGFR, FGFR, KIT, RAF, RET)                 | Hepatocellular Carcinoma                                                          | Camrelizumab, Torpalimab, Pembrolizumab | 2              | NA                      |
|                                                     | NCT02736305                   |                                                                  | Ovarian Cancer                                                                    |                                         | 2              | NA                      |
| <b>Sitravatinib (Mirati Therapeutics)</b>           | NCT02219711                   | MKI (RET, CBL, Trk, DDR, TYRO3, AXL, MERTK)                      | Multiple solid tumors                                                             | NA                                      | 1              | NA                      |
| <b>Sunitinib (Pfizer)</b>                           | NCT02691793                   | MKI (PDGFR, VEGFR, c-KIT, RET, CD114, CD135)                     | RET fusion-positive solid tumors                                                  | NA                                      | 4              | NA                      |
|                                                     | NCT02450123                   |                                                                  | Refractory solid tumors (RET-altered or FGFR2-amplified)                          | NA                                      | NA             | NA                      |
| <b>TPX-0046 (TurningPoint Therapeutics)</b>         | NCT04161391                   | MKI (RET, Src)                                                   | RET-Altered cancers (multiple)                                                    | NA                                      | 2              | NA                      |

Table 1. Currently active or recruiting clinical trials of RET-targeting agents. RET is a target of numerous multikinase inhibitors, as displayed here. In contrast, RET-selective targeting agents are a newer class of RTK inhibitors, and are currently being examined for the treatment of a more specific set of cancers. SOC refers to standard-of-care therapy.
